# Supplementary material for: MicroRNAs as diagnostic biomarkers for Tuberculosis: A systematic review and meta- analysis
Source: PubMed Central journal article supplement (PMC9551313; doi:10.3389/fimmu.2022.954396), 2022-09-27
Supplement: DataSheet_1.pdf [file DataSheet_1.pdf]

## SUPPLEMENTARY DATA

### Table of contents

- Supplementary table 1a: Search strategy used to retrieve published literature from Pubmed
- Supplementary table 1b: Search strategy used to retrieve published literature from Ovid
- Supplementary table 1c: Search strategy used to retrieve published literature from Cochrane
- STARD guidelines
- Supplementary figure 1: Funnel plot asymmetry test to assess publication bias

**Supplemental table 1A: Search strategy used to retrieve published literature from PubMed**

| Search Item  | Search term                                                                                                                                                                                                            | Connecting operator |
|--------------|------------------------------------------------------------------------------------------------------------------------------------------------------------------------------------------------------------------------|---------------------|
| Tuberculosis | (Tuberculosis [MeSH] OR Mycobacterium tuberculosis [MeSH] OR (Tuberculosis OR TB OR Mycobacterium tuberculosis OR MTB OR "M. Tuberculosis"))                                                                           | AND                 |
| Diagnosis    | (Diagnosis [MeSH] OR Diagnosis [subheading] OR Prognosis [MeSH] OR (Diagnosis OR diagnostic OR detect* OR predict* OR prognosis OR prognostic OR screen* OR distinguish* OR differentiat* OR discriminat*))            | AND                 |
| Biomarkers   | miRNA* OR microRNA* OR miR OR "small RNA"                                                                                                                                                                              | AND                 |
| Performance  | (Area under Curve [MeSH] OR Sensitivity and Specificity [MeSH] OR (Area under curve OR area under curves OR AUC OR receiver operating characteristic OR ROC OR Accuracy OR Performance OR sensitivity OR specificity)) | AND                 |
| Time Period  | (2000:2020[pdat])                                                                                                                                                                                                      |                     |

**Supplemental table 1B: Search strategy used to retrieve published literature from Ovid**

| Search Item  | Search term                                                                                                                                       | Connecting operator |
|--------------|---------------------------------------------------------------------------------------------------------------------------------------------------|---------------------|
| Tuberculosis | Tuberculosis OR TB OR Mycobacterium tuberculosis OR MTB OR "M. Tuberculosis"                                                                      | AND                 |
| Diagnosis    | Diagnosis OR diagnostic OR detect* OR predict* OR prognosis OR prognostic OR screen* OR distinguish* OR differentiat* OR discriminat*             | AND                 |
| Biomarkers   | miRNA* OR microRNA* OR miR OR "small RNA"                                                                                                         | AND                 |
| Performance  | Area under curve OR area under curves OR AUC OR receiver operating characteristic OR ROC OR Accuracy OR Performance OR sensitivity OR specificity | AND                 |
| Time Period  | 2000:2020                                                                                                                                         |                     |

**Supplemental table 1C: Search strategy used to retrieve published literature from Cochrane**

| Search Item | Search term                                                        |
|-------------|--------------------------------------------------------------------|
| #1          | MeSH descriptor: [Tuberculosis] explode all trees                  |
| #2          | Tuberculosis OR Mycobacterium tuberculosis                         |
| #3          | MeSH descriptor: [MicroRNAs] explode all trees                     |
| #4          | MicroRNA or miRNA or Micro RNA or stRNA                            |
| #5          | ROC Curve or diagnosis or diagnostic or specificity or sensitivity |
| #6          | #1 OR #2                                                           |
| #7          | #3 OR #4                                                           |
| #8          | #5 AND #6 AND #7                                                   |

**STARD guidelines**

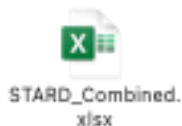

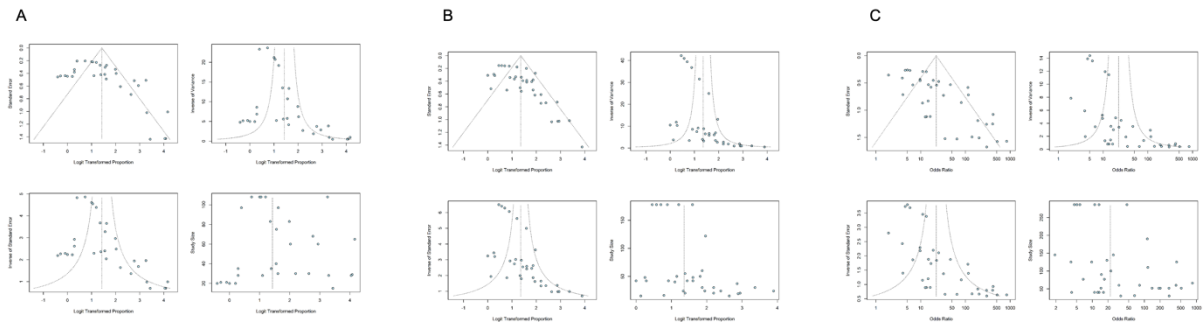

**Supplemental Figure 1: Funnel plot asymmetry test to assess publication bias:** Funnel plot is plotted for **(A)** Sensitivity **(B)** Specificity **(C)** Diagnostic Odds Ratio (DOR) of the 21 studies to show asymmetry of logit transformed proportion against standard error, inverse of variance, inverse of standard error and study size.
